# Supplementary material for: UV-C Peroxymonosulfate Activation for Wastewater Regeneration: Simultaneous Inactivation of Pathogens and Degradation of Contaminants of Emerging Concern
Source: MDPI journal article supplement (doi:10.3390/molecules26164890), 2021-08-12
Supplement: s1 [file s1]

**Titled:** UV-C Peroxymonosulfate Activation for Wastewater Regeneration: Simultaneous Inactivation of Pathogens and Degradation of Contaminants of Emerging Concern

**Authors:** Ilaria Berruti<sup>1</sup>, Samira Nahim-Granados <sup>1</sup>, María Jesús Abeledo-Lameiro<sup>1</sup>, Isabel Oller<sup>1,2</sup> and María Inmaculada Polo-López<sup>1,2,\*</sup>

**Affiliations:**

<sup>1</sup>CIEMAT-PSA, Carretera de Senés Km 4, 04200, Tabernas (Almería), Spain

<sup>2</sup>CIESOL, Joint Centre of the University of Almería-CIEMAT, 04120 Almería, Spain

**\*Correspondence:** mpolo@psa.es; Tel.: + 34 950 387900

**Supplementary Materials**

**Table S1.** Physico-chemical and microbiological characterization of SUWW and UWW.

| Parameter                               | SUWW      | UWW                                        |
|-----------------------------------------|-----------|--------------------------------------------|
| DOC (mg/L)                              | 11.1±2.5  | 19.6±2.8                                   |
| BOD <sub>5</sub> (mgO <sub>2</sub> /L)  | -         | 16±5                                       |
| COD ((mgO <sub>2</sub> /L)              | -         | 40±10                                      |
| [HCO <sub>3</sub> <sup>-</sup> ] (mg/L) | 69.5±7.3  | 370.0±28.0                                 |
| Turbidity (NTU)                         | 2.5±0.2   | 9.1±9.3                                    |
| pH                                      | 7.4±0.2   | 7.6±0.1                                    |
| Conductivity (mS/cm)                    | 1.5±0.1   | 2.4±0.1                                    |
| Cl <sup>-</sup> (mg/L)                  | 356.7±4.4 | 436.7±80.0                                 |
| NO <sub>3</sub> <sup>-</sup> (mg/L)     | 2.7±0.9   | 4.0±0.9                                    |
| NO <sub>2</sub> <sup>-</sup> (mg/L)     | -         | 6.0±3.1                                    |
| PO <sub>4</sub> <sup>3-</sup> (mg/L)    | 4.0±1.6   | 3.4±1.5                                    |
| Br <sup>-</sup> (mg/L)                  | -         | 2.8±0.1                                    |
| SO <sub>4</sub> <sup>2-</sup> (mg/L)    | 99.1±0.8  | 101.5±22.7                                 |
| Na <sup>+</sup> (mg/L)                  | 255.2±1.6 | 252.0±13.4                                 |
| NH <sub>4</sub> <sup>+</sup> (mg/L)     | 7.6±1.0   | 39.3±7.7                                   |
| K <sup>+</sup> (mg/L)                   | 9.5±2.3   | 27.8±1.0                                   |
| Ca <sup>2+</sup> (mg/L)                 | 18.6±3.4  | 88.5±11.5                                  |
| Mg <sup>2+</sup> (mg/L)                 | 13.3±1.6  | 46.7±7.5                                   |
| <i>E. coli</i> (CFU/mL)                 | -         | 5.87·10 <sup>3</sup> ±1.02·10 <sup>4</sup> |
| <i>Enterococcus</i> spp (CFU/mL)        | -         | 1.41·10 <sup>4</sup> ±2.24·10 <sup>4</sup> |
| <i>Pseudomonas</i> spp (CFU/mL)         | -         | 3.60·10 <sup>2</sup> ±5.03·10 <sup>2</sup> |
| <i>Total coliforms</i> (CFU/mL)         | -         | 1.43·10 <sup>4</sup> ±2.14·10 <sup>4</sup> |

**Table S2.** Conditions used in qPCR real-time assays.

| Genes                        | Primer sequence                                        | μM   | bp  | Conditions                                                                                                           | Ref.               |
|------------------------------|--------------------------------------------------------|------|-----|----------------------------------------------------------------------------------------------------------------------|--------------------|
| <i>16s rRNA</i>              | FW: TCCTACGGGAGGCAGCAGT<br>RV: ATTACCGCGGCTGCTGG       | 0.50 | 195 | 50°C - 1 min (1X); 95°C - 3 sec, 60°C - 30 sec (40X); 95°C - 15 sec; 60°C - 1 min; 95°C -15 sec                      | Modified from [19] |
| <i>intI1</i>                 | FW: GATCGGTCTGAATGCGTGT<br>RV: GCCTTGATGTTACCCGAGAG    | 0.50 | 196 | 50°C - 1 min (1X); 95°C - 3 sec, 60°C - 30 sec (40X); 95°C - 15 sec; 60°C - 1 min; 95°C -15 sec                      | Modified from [19] |
| <i>qnrS</i>                  | FW: GACGTGCTAACTTGCGTG<br>RV: TGGCATTGTTGGAAACTT       | 0.60 | 118 | 50°C - 1 min (1X); 95°C - 3 sec, 60°C - 30 sec (40X); 95°C - 15 sec; 60°C - 1 min; 95°C -15 sec                      | Modified from [19] |
| <i>sulI</i>                  | FW:CGCACCGGAAACATCGCTGCAC<br>RV: TGAAGTTCGCCGCAAGGCTCG | 0.30 | 162 | 50°C - 1 min (1X); 95°C - 3 sec, 60°C - 30 sec (40X); 95°C - 15 sec; 60°C - 1 min; 95°C -15 sec                      | Modified from [19] |
| <i>bla<sub>CTX-M32</sub></i> | FW: CGTCACGCTGTTGTTAGGAA<br>RV: CGCTCATCAGCACGATAAAG   | 0.30 | 156 | 95°C - 10 min (1X); 95°C - 30 sec; 55°C - 1 min; 72°C - 1 min (40X); 72°C - 7 min; 60°C - 10 sec; 95°C - 10 sec (1X) | [20]               |
| <i>Tet(M)</i>                | FW: GCAATTCTACTGATTTCTGC<br>RV:CTGTTTGATTACAATTTCCGC   | 0.20 | 186 | 50°C - 1 min (1X); 95°C - 3 sec, 60°C - 30 sec (40X); 95°C - 15 sec; 60°C - 1 min; 95°C -15 sec                      | Modified from [19] |
| <i>bla<sub>TEM</sub></i>     | FW:TTCCTGTTTTTGCTCACCCAG<br>RV:CTCAAGGATCTTACCGCTGTTG  | 0.20 | 113 | 50°C - 1 min (1X); 95°C - 3 sec, 60°C - 30 sec (40X); 95°C - 15 sec; 60°C - 1 min; 95°C -15 sec                      | Modified from [19] |

**Table S3.** Inactivation kinetic constants of *E. coli*, *E. faecalis* and *P. aeruginosa* in SUWW.

| [PMS]<br>mmol/L         | <i>E. coli</i>            |                | <i>E. faecalis</i>        |                | <i>P. aeruginosa</i>      |                |
|-------------------------|---------------------------|----------------|---------------------------|----------------|---------------------------|----------------|
|                         | k<br>(min <sup>-1</sup> ) | R <sup>2</sup> | k<br>(min <sup>-1</sup> ) | R <sup>2</sup> | k<br>(min <sup>-1</sup> ) | R <sup>2</sup> |
| <b>UV-C (Figure 1a)</b> |                           |                |                           |                |                           |                |
| 0                       | 0.960±0.162               | 0.919          | 0.747±0.084               | 0.963          | 1.010±0.194               | 0.847          |
|                         | 0.016±0.002               | 0.866          | 0.010±0.002               | 0.753          | 0.008±0.002               | 0.648          |
| 0.01                    | 1.130±0.210               | 0.884          | 0.921±0.036               | 0.995          | 1.170±0.206               | 0.913          |
|                         | 0.003±0.002               | 0.139          | 0.004±0.002               | 0.214          | 0.009±0.002               | 0.556          |
| 0.05                    | 1.110±0.193               | 0.915          | 0.911±0.041               | 0.994          | 1.140±0.210               | 0.896          |
|                         | 0.008±0.002               | 0.375          | 0.007±0.002               | 0.691          | 0.009±0.001               | 0.833          |
| 0.1                     | 1.120±0.191               | 0.918          | 0.911±0.017               | 0.999          | 1.170±0.241               | 0.881          |
|                         | 0.027±0.004               | 0.820          | 0.011±0.002               | 0.797          | 0.021±0.003               | 0.817          |
| 0.2                     | 1.140±0.154               | 0.947          | 0.864±0.134               | 0.931          | 1.200±0.199               | 0.922          |
|                         | 0.022±0.005               | 0.724          | 0.013±0.002               | 0.774          | 0.023±0.003               | 0.776          |
| 0.3                     | 1.000±0.189               | 0.900          | 0.752±0.110               | 0.938          | 1.030±0.237               | 0.856          |
|                         | 0.067±0.007               | 0.916          | 0.031±0.003               | 0.903          | 0.047±0.017               | 0.742          |
| 0.5                     | 1.240±0.219               | 0.911          | 0.845±0.098               | 0.960          | 1.270±0.226               | 0.910          |
|                         | 0.062±0.005               | 0.944          | 0.040±0.005               | 0.871          | 0.057±0.011               | 0.790          |

DL= 1CFU/100mL \*Shoulder length (SL)= 20 min \*\* SL= 50 min \*\*\* SL= 30 min

**Table S4.** Pseudo-first order degradation kinetic constants of Trimethoprim (TMP), Sulfamethoxazole and Diclofenac (DCF) in SUWW.

| [PMS]<br>mmol/L         | TMP                       |                | SMX                       |                | DCF                       |                |
|-------------------------|---------------------------|----------------|---------------------------|----------------|---------------------------|----------------|
|                         | k<br>(min <sup>-1</sup> ) | R <sup>2</sup> | k<br>(min <sup>-1</sup> ) | R <sup>2</sup> | k<br>(min <sup>-1</sup> ) | R <sup>2</sup> |
| <b>UV-C (Figure 1b)</b> |                           |                |                           |                |                           |                |
| 0                       | 0.007±0.001               | 0.978          | 0.107±0.005               | 0.978          | 0.113±0.012               | 0.927          |
| 0.01                    | 0.009±0.001               | 0.997          | 0.121±0.006               | 0.978          | 0.166±0.010               | 0.970          |
| 0.05                    | 0.015±0.001               | 0.974          | 0.129±0.006               | 0.974          | 0.185±0.012               | 0.966          |
| 0.1                     | 0.028±0.001               | 0.997          | 0.136±0.005               | 0.986          | 0.195±0.012               | 0.974          |
| 0.2                     | 0.059±0.001               | 0.996          | 0.147±0.008               | 0.975          | 0.204±0.021               | 0.930          |
| 0.3                     | 0.096±0.002               | 0.995          | 0.184±0.005               | 0.995          | 0.229±0.036               | 0.869          |
| 0.5                     | 0.175±0.008               | 0.985          | 0.230±0.005               | 0.996          | 0.214±0.025               | 0.918          |

**Table S5.** Inactivation kinetic constants of *E. coli*, Total Coliforms, *Enterococcus* spp and *Pseudomonas* spp in UWW

| [PMS]<br>(mmol/L)       | <i>E. coli</i>            |                | Total Coliforms           |                | <i>Enterococcus</i> spp   |                | <i>Pseudomonas</i> spp    |                |
|-------------------------|---------------------------|----------------|---------------------------|----------------|---------------------------|----------------|---------------------------|----------------|
|                         | k<br>(min <sup>-1</sup> ) | R <sup>2</sup> |
| <b>UV-C (Figure 2a)</b> |                           |                |                           |                |                           |                |                           |                |
| 0                       | 0.193±0.023               | 0.900          | 0.202±0.031               | 0.841          | 0.271±0.001               | 0.999          | 0.124±0.027               | 0.691          |
|                         | 0.003±0.000               |                | 0.007±0.001               | 0.876          |                           |                |                           |                |
| 0.1                     | 0.392±0.091               | 0.815          | 0.390±0.055               | 0.926          | 0.311±0.035               | 0.952          | 0.686±0.081               | 0.959          |
|                         | 0.035±0.015               | 0.681          | 0.026±0.005               | 0.937          |                           |                | 0.085±0.017               | 0.926          |
| 0.5                     | 0.464±0.046               | 0.952          | 0.416±0.045               | 0.933          | 0.379±0.062               | 0.860          | 1.075±0.083               | 0.976          |
|                         | 0.077±0.012               | 0.954          | 0.015±0.002               | 0.938          |                           |                |                           |                |
| 0.75                    | 0.519±0.084               | 0.902          | 0.518±0.096               | 0.876          | 0.485±0.032               | 0.979          | 0.624±0.068               | 0.944          |
|                         | 0.035±0.008               | 0.889          | 0.071±0.017               | 0.887          |                           |                |                           |                |
| 1                       | 0.416±0.076               | 0.851          | 0.896±0.082               | 0.975          | 0.530±0.053               | 0.952          | 0.958±0.056               | 0.987          |
|                         | 0.007±0.003               | 0.786          | 0.080±0.024               | 0.766          |                           |                |                           |                |

**Table S6.** Pseudo-first order degradation kinetic constants of Trimethoprim (TMP), Sulfamethoxazole (SMX) and Diclofenac (DCF) in UWW

| [PMS]<br>(mmol/L)       | TMP                       |                | SMX                       |                | DCF                       |                |
|-------------------------|---------------------------|----------------|---------------------------|----------------|---------------------------|----------------|
|                         | k<br>(min <sup>-1</sup> ) | R <sup>2</sup> | k<br>(min <sup>-1</sup> ) | R <sup>2</sup> | k<br>(min <sup>-1</sup> ) | R <sup>2</sup> |
| <b>UV-C (Figure 2b)</b> |                           |                |                           |                |                           |                |
| 0                       | 0.001±0.000               | 0.957          | 0.071±0.004               | 0.968          | 0.110±0.018               | 0.903          |
| 0.1                     | NA                        |                | 0.088±0.004               | 0.974          | 0.119±0.013               | 0.925          |
| 0.5                     | NA                        |                | 0.076±0.003               | 0.986          | 0.205±0.040               | 0.779          |
| 0.75                    | 0.033±0.002               | 0.935          | 0.144±0.004               | 0.993          | 0.197±0.018               | 0.943          |
| 1                       | 0.045±0.002               | 0.974          | 0.185±0.010               | 0.970          | 0.314±0.039               | 0.900          |

NA= no fitting;

**Table S7.** ARGs means and standard deviation of the ratio detected in this study.

|                             | <i>16s rRNA</i> | <i>intI1</i> | <i>sulI</i> | <i>bla<sub>CTX-M32</sub></i> | <i>bla<sub>TEM</sub></i> | <i>tetM</i> | <i>qnrS</i> |
|-----------------------------|-----------------|--------------|-------------|------------------------------|--------------------------|-------------|-------------|
| Time<br>(min)               | Mean±SD         | Mean±SD      | Mean±SD     | Mean±SD                      | Mean±SD                  | Mean±SD     | Mean±SD     |
| <b>UV-C (Figure 3b)</b>     |                 |              |             |                              |                          |             |             |
| 0                           | 1.00±0.01       | 0.67±0.01    | 0.52±0.00   | 0.38±0.01                    | 0.48±0.00                | 0.51±0.01   | 0.40±0.00   |
| 20                          | 0.87±0.01       | 0.51±0.00    | 0.49±0.01   | 0.36±0.01                    | 0.45±0.01                | 0.37±0.00   | 0.37±0.01   |
| 40                          | 0.73±0.01       | 0.45±0.00    | 0.44±0.00   | QL                           | 0.39±0.00                | 0.35±0.00   | QL          |
| 60                          | 0.67±0.01       | 0.41±0.00    | 0.40±0.00   | QL                           | 0.39±0.00                | 0.36±0.00   | QL          |
| <b>PMS/UV-C (Figure 3b)</b> |                 |              |             |                              |                          |             |             |
| 0                           | 1.00±0.04       | 0.64±0.02    | 0.54±0.02   | 0.44±0.01                    | 0.41±0.01                | 0.38±0.01   | 0.37±0.01   |
| 20                          | 0.64±0.02       | 0.49±0.02    | 0.42±0.01   | 0.31±0.01                    | 0.34±0.01                | QL          | QL          |
| 40                          | 0.63±0.02       | 0.41±0.02    | 0.41±0.01   | 0.32±0.01                    | 0.32±0.01                | QL          | QL          |
| 60                          | 0.52±0.02       | 0.35±0.01    | QL          | QL                           | QL                       | QL          | QL          |

QL, quantification limit

**Table S8.** Treatment efficiencies achieved in continuous flow (after 2 min) and in batch mode (considering the treatment time to achieve *E. coli* ≤ 10 CFU/100 mL and 80% of removal of CECs) by UV-C and PMS/UV-C (0.5 mmol/L).

|                |          | Continuous Flow |                                       | Batch mode<br><i>E. coli</i> ≤ 10 CFU/100 mL<br>80% of removal of CECs |                                       |
|----------------|----------|-----------------|---------------------------------------|------------------------------------------------------------------------|---------------------------------------|
|                |          | Time (min)      | Log (C <sub>i</sub> /C <sub>f</sub> ) | Time (min)                                                             | Log (C <sub>i</sub> /C <sub>f</sub> ) |
| <i>E. coli</i> | UV-C     | 2               | 0.5                                   | 30                                                                     | 4.6                                   |
|                | PMS/UV-C | 2               | 1.6                                   | 15                                                                     | 4.7                                   |
| CECs           | UV-C     | 2               | 0.009                                 | 180                                                                    | 0.6                                   |
|                | PMS/UV-C | 2               | 0.119                                 | 12                                                                     | 0.7                                   |

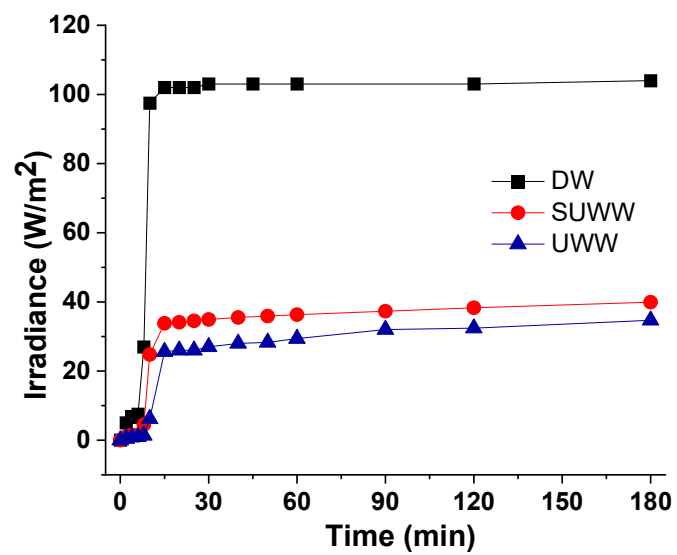

**Figure S1.** UV-C lamp irradiance (W/m<sup>2</sup>) profiles registered in demineralized water (as baseline), SUWW and UWW.

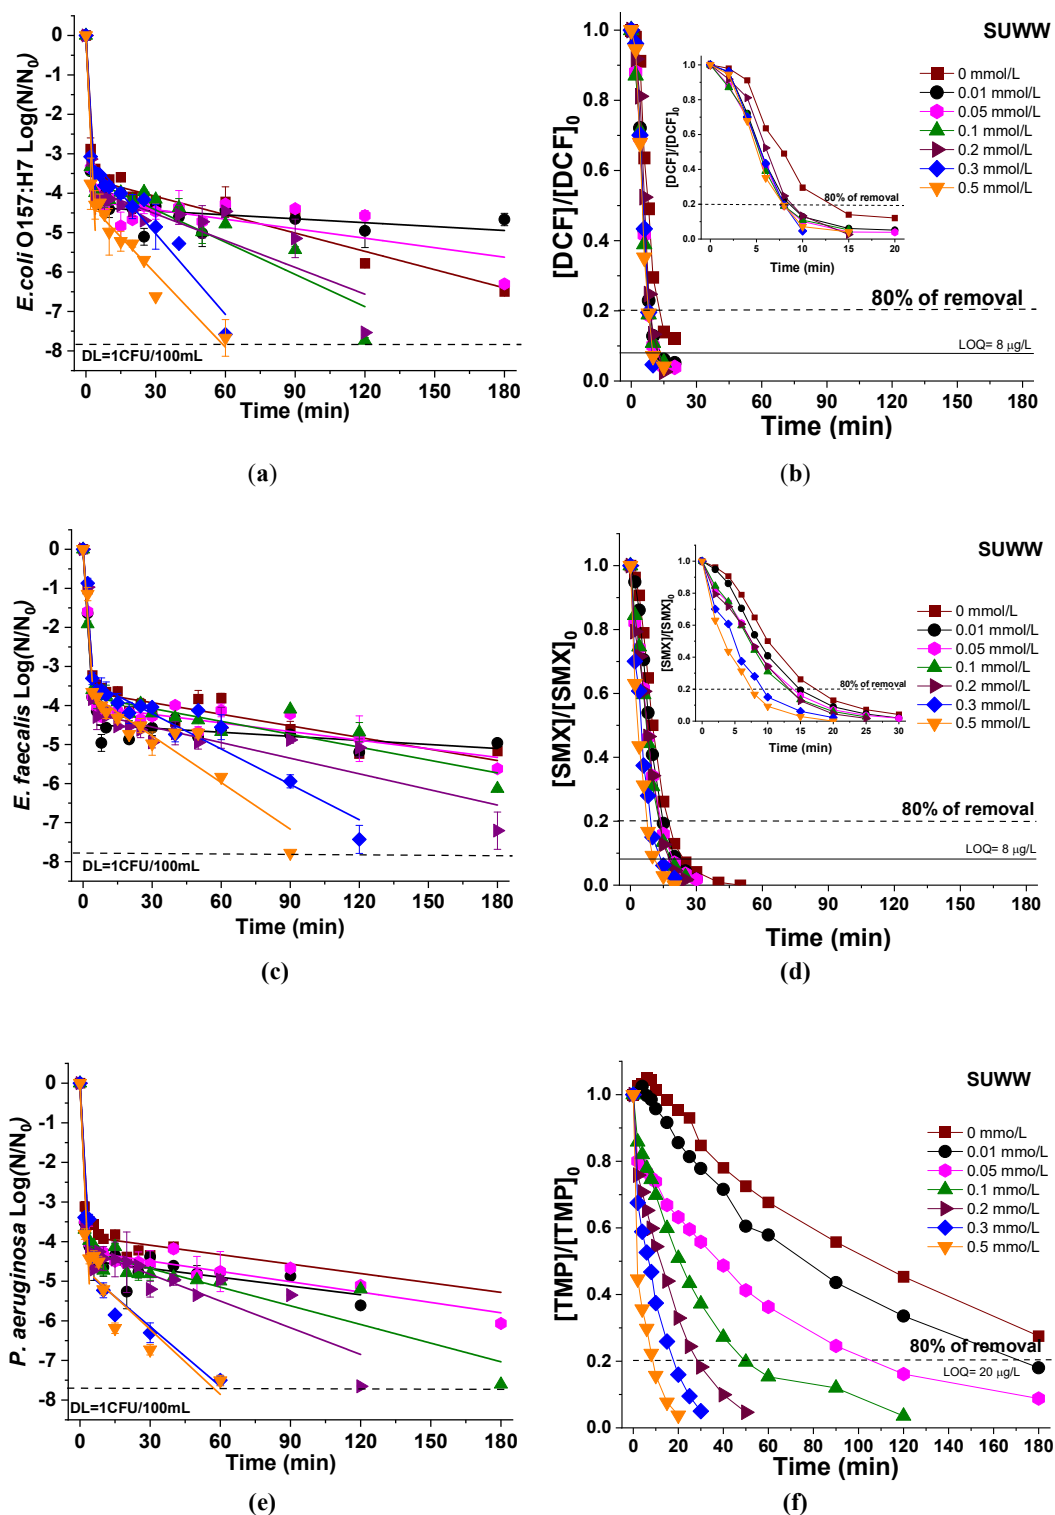

**Figure S2.** Inactivation profiles of *E. coli* (a), *E. faecalis* (c) and *P. aeruginosa* (e) and degradation profiles of DCF (b), SMX (d) and TMP (f) in the presence of increasing concentrations of PMS (0-0.5 mmol/L) and under UV-C irradiation in SUWW. Inserts: Enlargement of degradation curves.

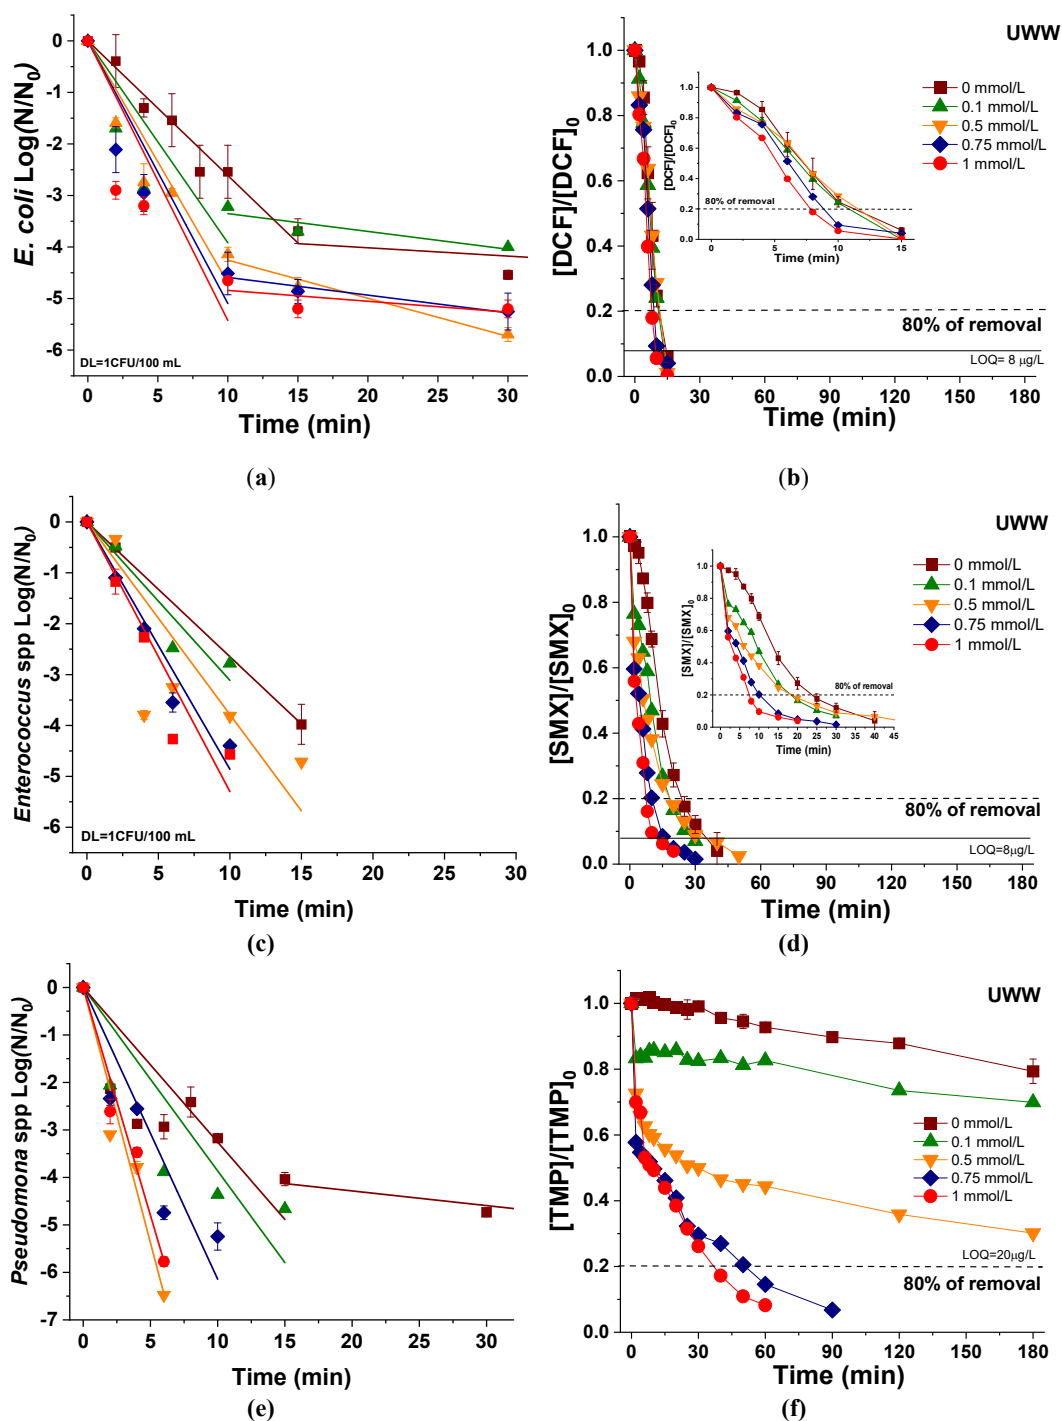

**Figure S3.** Inactivation profiles of *E. coli* (a), *Enterococcus* spp (c) and *Pseudomonas* spp (e) and degradation profiles of DCF (b), SMX (d) and TMP (f) in the presence of increasing concentrations of PMS (0-1 mmol/L) and under UV-C irradiation in UWW. Inserts: Enlargement of degradation curves.

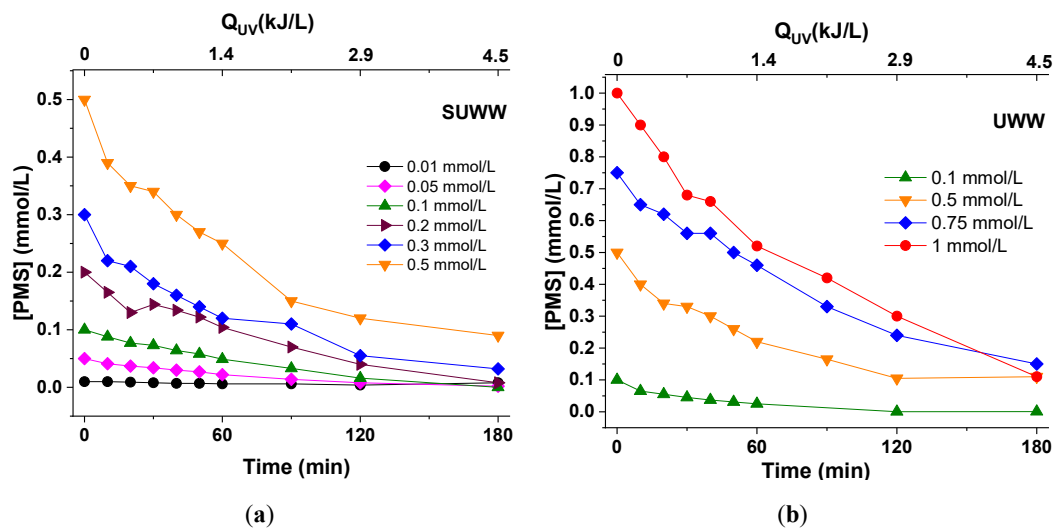

**Figure S4.** PMS concentration decrease in function of time (minutes) and accumulative UV energy  $Q_{UV}$  (kJ/L) under UV-C treatment at different PMS concentrations in SUWW (0.01-0.5 mmol/L) (a) and in UWW (0.1-1 mmol/L) (b).
